# Supplementary material for: Ultra-selective detection of Fe2+ ion by redox mechanism based on fluorescent polymerized dopamine derivatives
Source: Royal Society of Chemistry journal article supplement (doi:10.1039/c7ra04107a), 2017-01-01
Supplement: c7ra04107a1.pdf [file c7ra04107a1.pdf]

## Supporting Information

# **Ultra-selective Detection of Fe<sup>2+</sup> ion by Redox Mechanism Based on Fluorescent Polymerized Dopamine Derivatives**

Taeuk An<sup>1‡</sup>, Namhun Lee<sup>1‡</sup>, Hong-Jun Cho<sup>2</sup>, Seongsoo Kim<sup>1</sup>, Dong-Sik Shin<sup>3\*</sup>, Sang-Myung Lee<sup>1\*</sup>

<sup>1</sup>Department of Chemical Engineering, Kangwon National University, Gangwon-do 24341, Republic of Korea

<sup>2</sup>School of Chemical and Biological Engineering, Seoul National University, Seoul 08826, Republic of Korea

<sup>3</sup>Department of Chemical and Biological Engineering, Sookmyung Women's University, Seoul 04310, Republic of Korea

‡ These authors contributed equally to this work.

a.

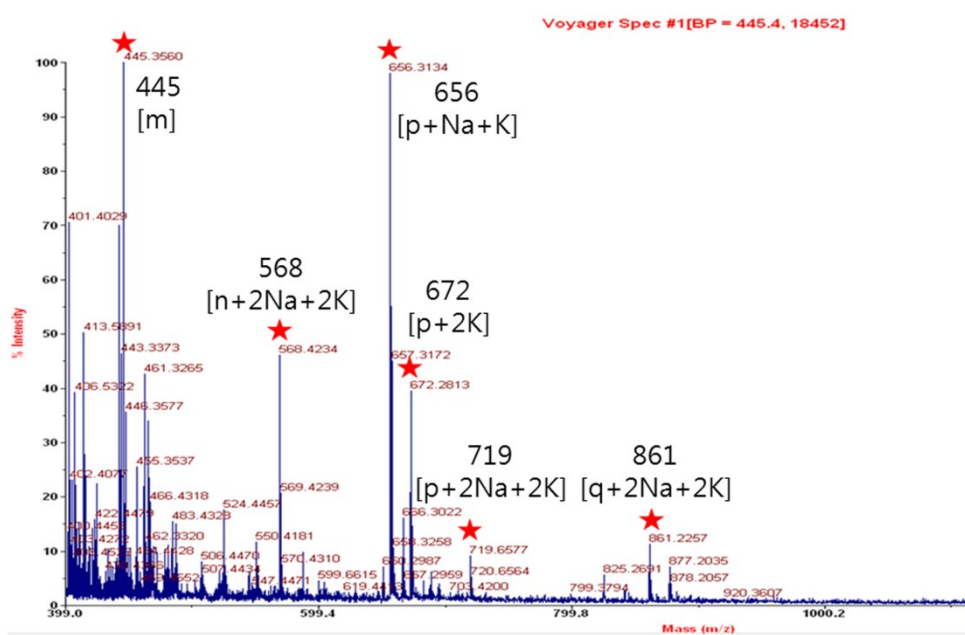

b.

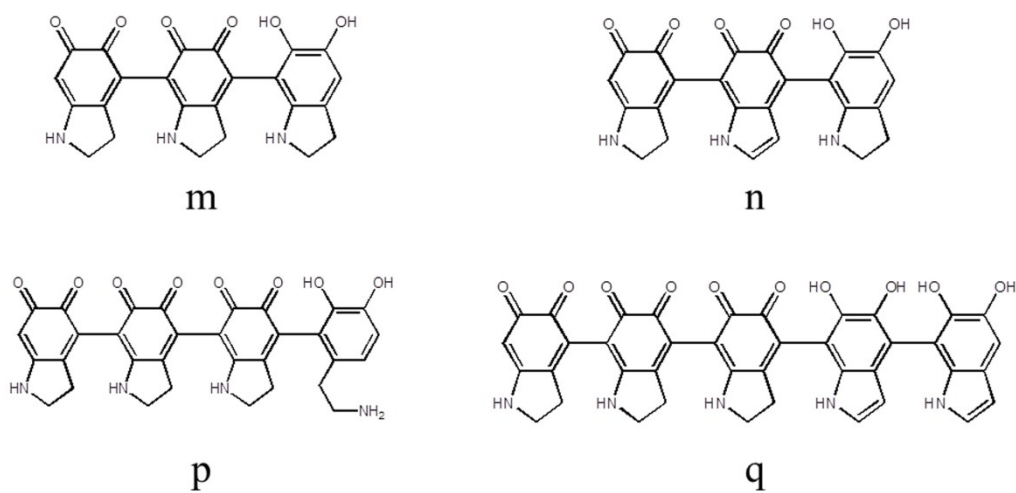

**Figure S1.** (a) MALDI-TOF mass spectra of F-ODA (pH 7.4) and (b) the proposed chemical structures of the F-ODA.

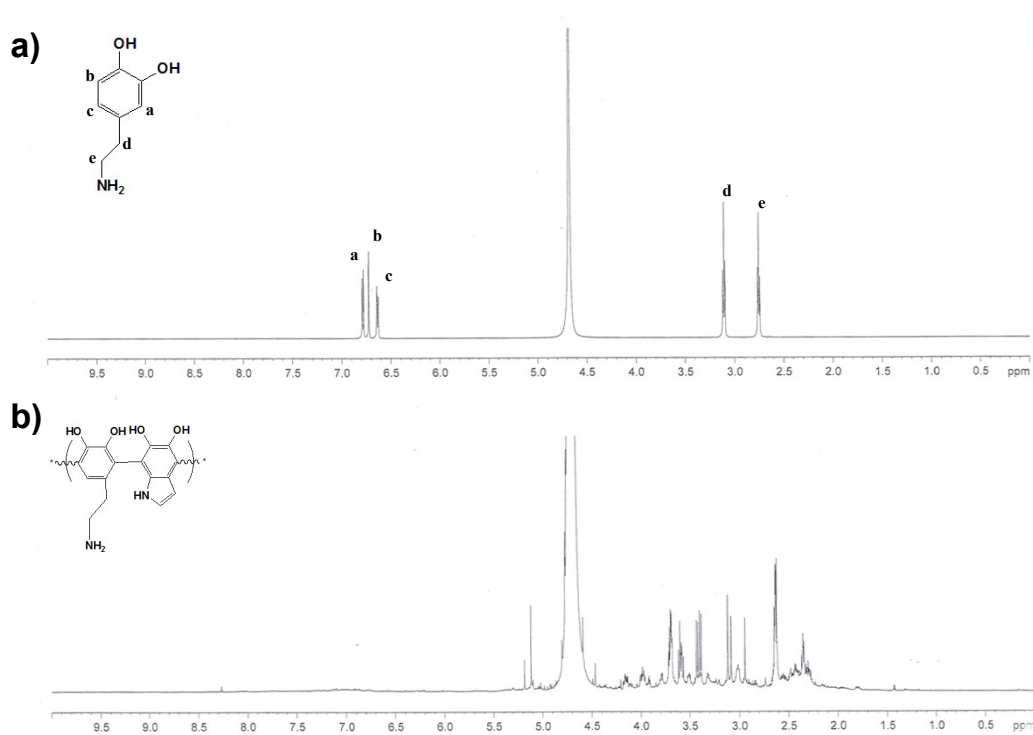

**Figure S2.** The  $^1\text{H}$  NMR analysis ( $\text{D}_2\text{O}$ ) of (a) pure dopamine and (b) F-ODA.

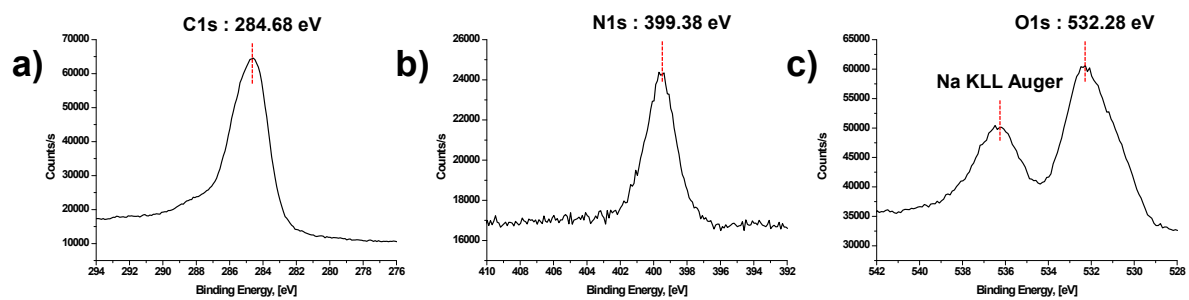

**Figure S3.** XPS spectra of polydopamine, (a) C1s, (b) N1s, and (c) O1s.

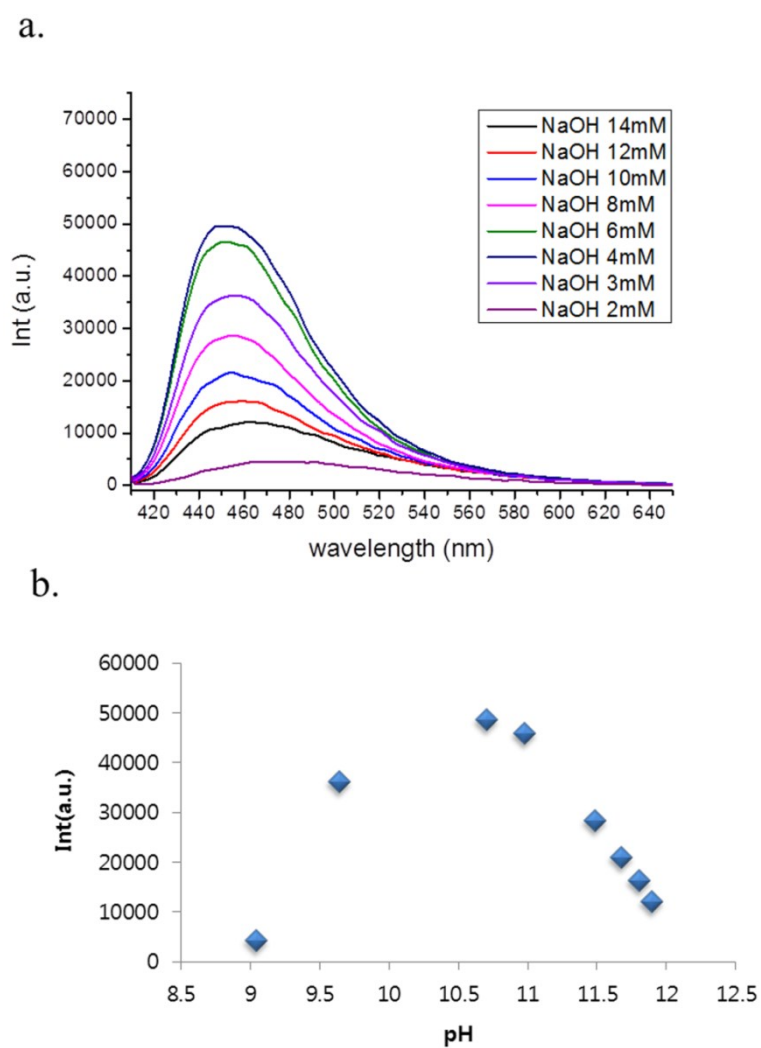

**Figure S4.** (a) Fluorescence spectra of F-ODA depending on the final concentration of NaOH and (b) maximum intensity of F-ODA upon the pH of reacting solution.

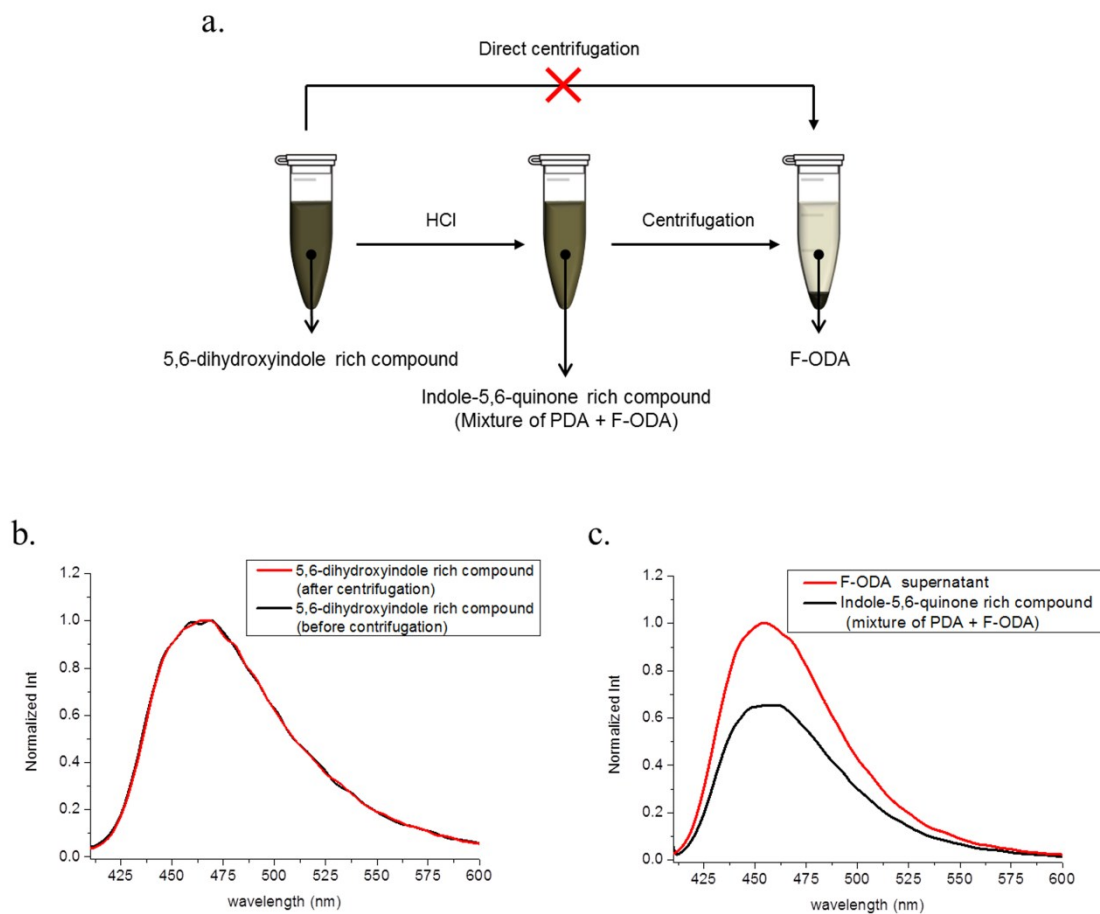

**Figure S5.** (a) A concise scheme for the experiment about effect of adding HCl. Normalized fluorescence spectra of (b) 5,6-dihydroxyindole-rich compound before and after centrifugation and (c) F-ODA supernatant and indole-5,6-quinone-rich compound.

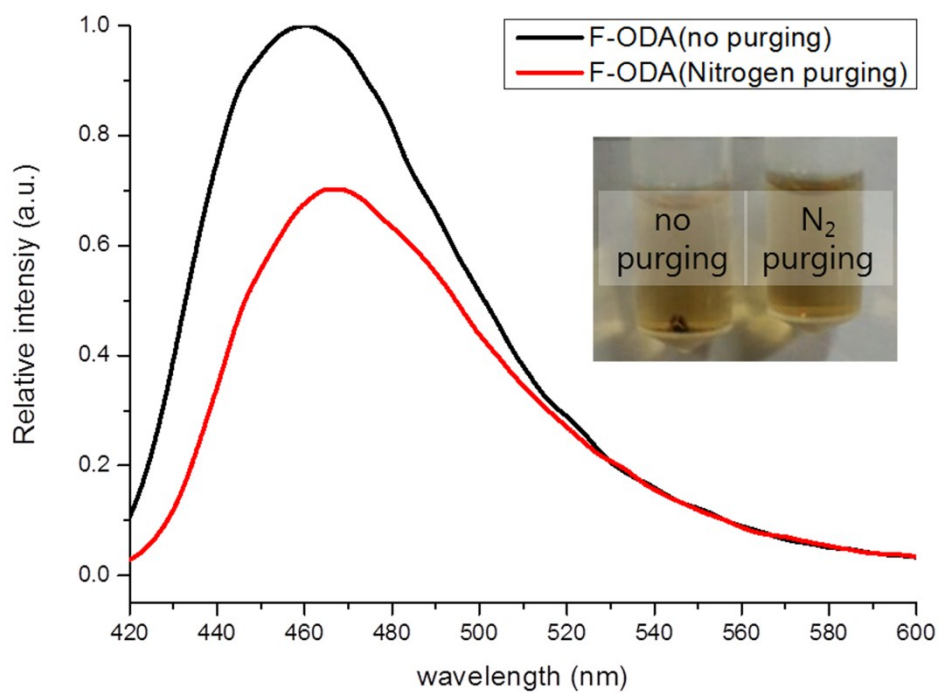

**Figure S6.** Fluorescence spectra of F-ODA depending on the presence or absence of nitrogen purging to eliminate dissolved oxygen before adding HCl.

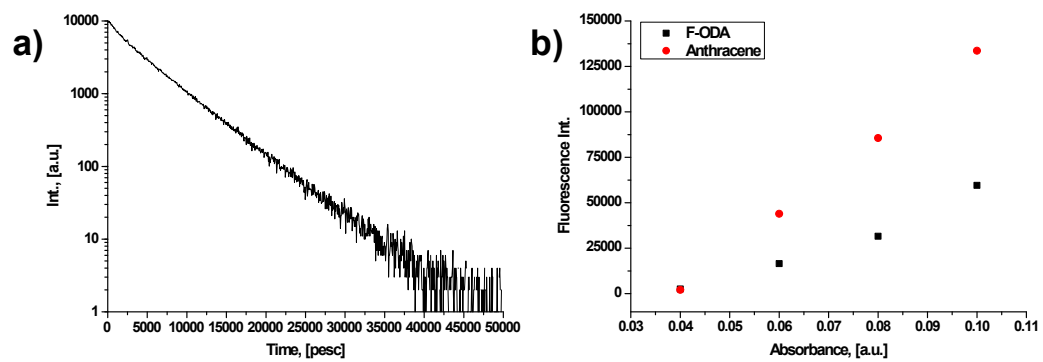

**Figure S7.** (a) The F-ODA decay curve measured at room temperature. (b) The plot of absorbance vs. area of fluorescence on anthracene (red dots) and F-ODA (black dots).



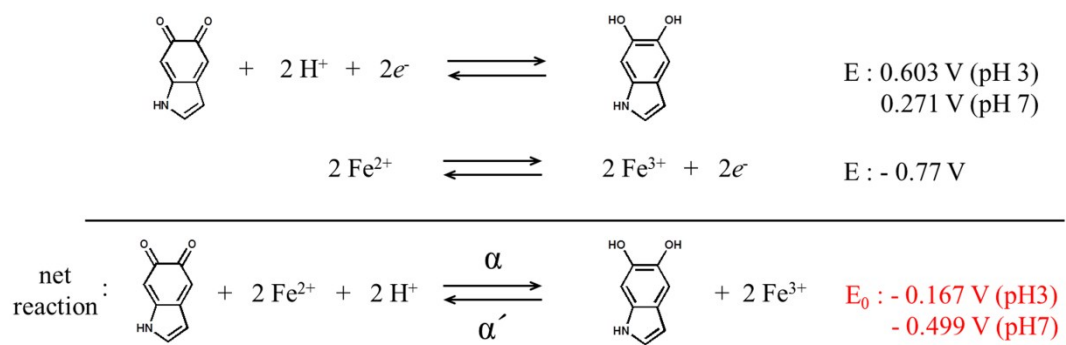

**Figure S8.** Redox potentials of half reactions triggered by adding  $\text{Fe}^{2+}$  ion.

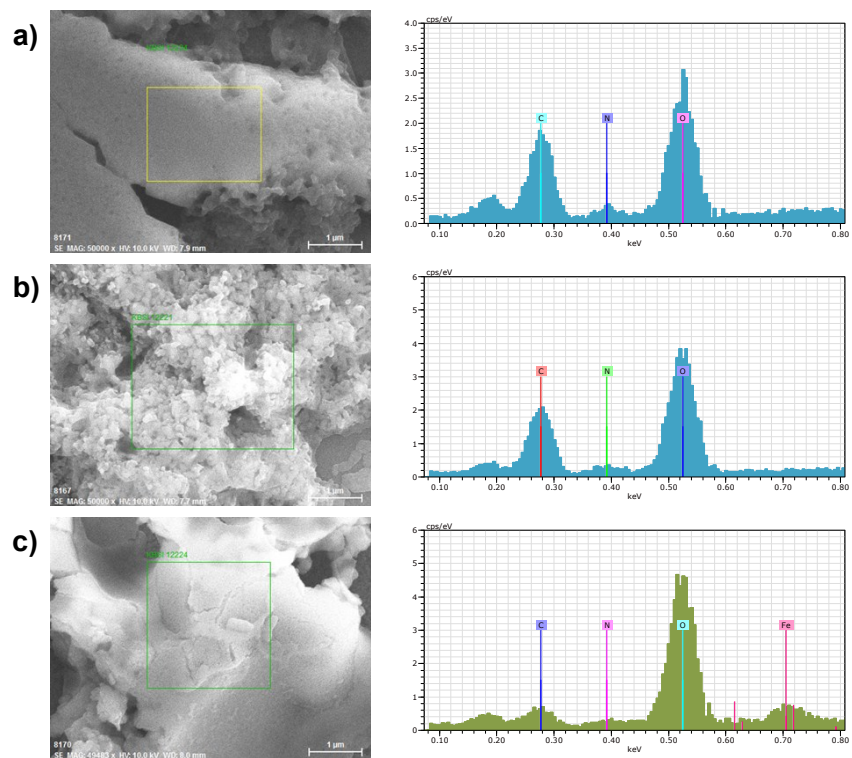

**Figure S9.** SEM-EDS results of (a) F-ODA (supernatant), (b) PDA (precipitate), and (c) F-ODA chelated with Fe<sup>2+</sup> ions.

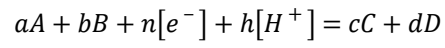

$$E_h = E_0 + \frac{0.05916}{n} \log \left( \frac{\{A\}^a \{B\}^b}{\{C\}^c \{D\}^d} \right) - \frac{0.05916}{n} pH$$

**Equation S1.** Nernst Equation.
